# Supplementary material
Source: publisher figshare collection journal article supplement (https://karger.figshare.com/articles/dataset/_/28782287)
Supplement: Supplementary file 1 [file 1]

**Table S1. Cox regression models for the association of SI and composite event risk in CAD patients with or without AVSc**

|  |  | **Crude model** | | **Model 1** | | **Model 2** | | **Model 3** | |
| --- | --- | --- | --- | --- | --- | --- | --- | --- | --- |
|  |  | **HR (95% CI)** | ***P* value** | **HR (95% CI)** | ***P* value** | **HR (95% CI)** | ***P* value** | **HR (95% CI)** | ***P* value** |
| **CAD** | **Primary endpoint** | | | | | | | | |
| SI≥89.40 | 1 (ref) |  | 1 (ref) |  | 1 (ref) |  | 1 (ref) |  |
| SI<89.40 | 1.435 (1.139, 1.807) | 0.002 | 1.447 (1.137, 1.842) | 0.003 | 1.233 (0.959, 1.585) | 0.102 | 1.283 (0.996, 1.653) | 0.054 |
| **Secondary endpoint** | | | | | | | | |
| SI≥89.40 | 1 (ref) |  | 1 (ref) |  | 1 (ref) |  | 1 (ref) |  |
| SI<89.40 | 1.462 (1.176, 1.818) | 0.001 | 1.478 (1.177, 1.856) | 0.001 | 1.249 (0.986, 1.583) | 0.066 | 1.134 (1.033, 1.670) | 0.026 |

Crude model: unadjusted model

Model 1: adjusted for age and gender

Model 2: model 1 in addition to blood pressure, HbA1c, Lp(a), Ca, P, eGFR, CRP, left ventricular ejection fraction, hypertension, and drug usage

Model3: model 2 in addition to smoking, alcohol use, diabetes, lipid profiles, fasting glucose and r-GT

HR indicates hazard ratio; SI, sarcopenia index; CAD, coronary artery disease; AVSc, aortic valve sclerosis.
